# Supplementary material
Source: publisher figshare collection journal article supplement (https://sage.figshare.com/ndownloader/files/18005078)
Supplement: Supplementary file 1 [file 18005078]

| *Appendix A:* | | | | | | | | | | | | | | | | |
| --- | --- | --- | --- | --- | --- | --- | --- | --- | --- | --- | --- | --- | --- | --- | --- | --- |
| Correlations between the predictors and teachers’ career intentions. | | | | | | | | | | | | | | | | |
|  | 1 | 2 | 3 | 4 | 5 | 6 | 7 | 8 | 9 | 10 | 11 | 12 | 13 | 14 | 15 |
| 1. SET | 1.00 |  |  |  |  |  |  |  |  |  |  |  |  |  |  |
| 2. Grades | .353 | 1.00 |  |  |  |  |  |  |  |  |  |  |  |  |  |
| 3. Subjects | -.363 | -.234 | 1.00 |  |  |  |  |  |  |  |  |  |  |  |  |
| 4. Student problems | 0.003 | .159 | .032 | 1.00 |  |  |  |  |  |  |  |  |  |  |  |
| 5. Elem. | -.045 | -.441 | -.057 | -.344 | 1.00 |  |  |  |  |  |  |  |  |  |  |
| 6. Second | .027 | .342 | .057 | .313 | -.839 | 1.00 |  |  |  |  |  |  |  |  |  |
| 7. Combined | .035 | .223 | -.008 | .095 | -.398 | -.165 | 1.00 |  |  |  |  |  |  |  |  |
| 8. Time | -.086 | -.016 | .088 | .0565 | -.042 | .043 | -.003 | 1.00 |  |  |  |  |  |  |  |
| 9. School  FRL | .013 | -.016 | -.018 | .211 | -.142 | -.175 | .037 | -.021 | 1.00 |  |  |  |  |  |  |
| 10. Admin.  support | .030 | -.011 | -.021 | -.359 | .075 | -.0560 | -.035 | -.041 | -.055 | 1.00 |  |  |  |  |  |
| 11. Collegial  support | -.013 | -.119 | -.019 | -.433 | .206 | -.195 | -.044 | -.049 | -.043 | .590 | 1.00 |  |  |  |  |
| 12. Materials | -.015 | .003 | -.015 | -.268 | .016 | -.016 | .002 | -.044 | -.141 | .344 | .287 | 1.00 |  |  |  |
| 13. Exp. | -.024 | .009 | -.014 | -.077 | .025 | -.023 | -.007 | -.044 | -.062 | -.016 | .068 | .043 | 1.00 |  |  |
| 14. Full cert. | -.054 | -.018 | .010 | -.010 | .009 | .003 | -.021 | -.016 | -.051 | -.015 | .044 | .052 | .2166 | 1.00 |  |
| 15. Intent | .028 | .005 | -.030 | -.030 | .036 | -.024 | -.025 | -.078 | -.150 | .576 | .435 | .304 | .095 | .038 | 1.00 |
